# Supplementary material
Source: PubMed Central journal article supplement (PMC5377503)
Supplement: AEM.03295-16_zam999117763s1.pdf [file AEM.03295-16_zam999117763s1.pdf]

**Temperature-Dependent Growth Modeling of Environmental and Clinical  
*Legionella pneumophila* Multilocus Variable-Number Tandem-Repeat Analysis  
(MLVA) Genotypes**

Yehonatan Sharaby, Sarah Rodríguez-Martínez, Olga Oks, Marina Pecellin, Hila Mizrahi, Avi  
Peretz, Ingrid Brettar, Manfred G. Höfle and Malka Halpern

**Supplementary Tables**

**Table S1.** MLVA-8 designated genotypes, isolation source and the temperatures at which growth parameters reached maximal values for each strain.

**Table S2.** List of models fitted for strain growth curves at each temperature.

**Table S1.** MLVA-8 designated genotypes, isolation source and the temperatures at which growth parameters reached maximal values for each strain.

| Strain | Source | MLVA-8 Genotype | Optimal values |         |      | Growth range |
|--------|--------|-----------------|----------------|---------|------|--------------|
|        |        |                 | $\lambda$      | $\mu_m$ | A    |              |
| C1     | Cl     | 4               | 25°C           | 37°C    | 37°C | <25-42°C     |
| C4     | Cl     | 4               | 25°C           | 37°C    | 37°C | <25-42°C     |
| C9     | Cl     | 4               | 30°C           | 37°C    | 37°C | <25-42°C     |
| C10    | Cl     | 4               | 25°C           | 37°C    | 37°C | <25-42°C     |
| C5     | Cl     | 6               | 25°C           | 37°C    | 37°C | <25-42°C     |
| C7     | Cl     | 6               | 25°C           | 37°C    | 42°C | <25-42°C     |
| C3     | Cl     | 19              | 25°C           | 37°C    | 37°C | <25-42°C     |
| C11    | Cl     | 20              | 25°C           | 37°C    | 37°C | <25-42°C     |
| C6     | Cl     | 22              | 25°C           | 37°C    | 42°C | <25-42°C     |
| C8     | Cl     | 22              | 25°C           | 37°C    | 37°C | <25-42°C     |
| C2     | Cl     | 24              | 25°C           | 37°C    | 37°C | <25-42°C     |
| C12    | Cl     | N.A             | 25°C           | 42°C    | 42°C | <25-42°C     |
| O123   | Env    | 4               | 25°C           | 42°C    | 25°C | <25-42°C     |
| O128   | Env    | 4               | 25°C           | 42°C    | 25°C | <25-42°C     |
| O55    | Env    | 4               | 25°C           | 42°C    | 25°C | <25-42°C     |
| O72    | Env    | 4               | 25°C           | 42°C    | 25°C | <25-42°C     |
| O75    | Env    | 4               | 25°C           | 42°C    | 25°C | <25-42°C     |
| O8     | Env    | 4               | 25°C           | 42°C    | 25°C | <25-42°C     |
| O86    | Env    | 4               | 25°C           | 42°C    | 25°C | <25-42°C     |
| O9     | Env    | 4               | 25°C           | 42°C    | 25°C | <25-42°C     |
| O28    | Env    | 6               | 25°C           | 37°C    | 25°C | <25-42°C     |
| O29    | Env    | 6               | 25°C           | 30°C    | 25°C | <25-42°C     |
| O35    | Env    | 6               | 25°C           | 37°C    | 25°C | <25-42°C     |
| O36    | Env    | 6               | 25°C           | 37°C    | 30°C | <25-42°C     |
| O93    | Env    | 6               | 25°C           | 37°C    | 42°C | <25-42°C     |
| O94    | Env    | 6               | 25°C           | 37°C    | 42°C | <25-42°C     |
| O100   | Env    | 15              | 30°C           | 42°C    | 37°C | <25-45°C     |
| O101   | Env    | 15              | 30°C           | 42°C    | 42°C | <25-45°C     |
| O58    | Env    | 15              | 25°C           | 37°C    | 30°C | <25-45°C     |
| O59    | Env    | 15              | 25°C           | 42°C    | 30°C | <25-45°C     |
| O60    | Env    | 15              | 25°C           | 42°C    | 42°C | <25-45°C     |
| O61    | Env    | 15              | 25°C           | 42°C    | 42°C | <25-45°C     |

Cl, Clinical; Env, Environmental;  $\lambda$ , Shortest lag phase;  $\mu_m$ , Maximal growth rate; A, Maximal cell density.

**Table S2.** List of models fitted for strain growth curves at each temperature.

| Strain | Fitted model <sup>a</sup> |              |              |              |
|--------|---------------------------|--------------|--------------|--------------|
|        | 25°C                      | 30°C         | 37°C         | 42°C         |
| C1     | gompertz.exp              | gompertz     | gompertz     | gompertz     |
| C2     | gompertz                  | richards     | gompertz     | gompertz     |
| C3     | gompertz                  | richards     | gompertz     | richards     |
| C4     | gompertz                  | gompertz     | gompertz     | gompertz     |
| C5     | gompertz                  | gompertz     | gompertz     | gompertz     |
| C6     | gompertz                  | gompertz     | gompertz     | gompertz     |
| C7     | gompertz                  | gompertz     | gompertz     | gompertz     |
| C8     | gompertz.exp              | gompertz     | gompertz     | gompertz     |
| C9     | gompertz.exp              | gompertz     | gompertz     | richards     |
| C10    | gompertz                  | gompertz     | gompertz     | gompertz     |
| C11    | gompertz.exp              | gompertz     | gompertz     | gompertz     |
| C12    | gompertz.exp              | gompertz     | gompertz     | gompertz     |
| O100   | gompertz                  | gompertz     | gompertz     | gompertz     |
| O101   | richards                  | gompertz.exp | gompertz     | gompertz     |
| O123   | richards                  | gompertz     | gompertz     | richards     |
| O128   | richards                  | richards     | gompertz     | richards     |
| O28    | richards                  | gompertz     | richards     | gompertz     |
| O29    | richards                  | gompertz.exp | gompertz     | gompertz.exp |
| O35    | richards                  | gompertz     | gompertz     | gompertz     |
| O36    | richards                  | richards     | gompertz     | gompertz     |
| O55    | richards                  | richards     | gompertz     | richards     |
| O58    | richards                  | richards     | gompertz     | gompertz     |
| O59    | richards                  | gompertz     | gompertz     | richards     |
| O60    | richards                  | richards     | gompertz     | gompertz     |
| O61    | richards                  | gompertz     | gompertz     | richards     |
| O72    | richards                  | richards     | gompertz     | richards     |
| O75    | richards                  | richards     | gompertz     | logistic     |
| O8     | logistic                  | gompertz     | gompertz     | richards     |
| O86    | richards                  | richards     | gompertz.exp | richards     |
| O9     | richards                  | richards     | gompertz     | richards     |
| O93    | richards                  | richards     | gompertz     | gompertz     |
| O94    | richards                  | richards     | richards     | gompertz     |

<sup>a</sup>See Table 2 for the models equations.
